# Supplementary material for: A CRISPR-Assisted Nonhomologous End-Joining Strategy for Efficient Genome Editing in Mycobacterium tuberculosis
Source: PubMed Central journal article supplement (PMC6989103; doi:10.1128/mbio.02364-19), 2020-01-28
Supplement: mBio.02364-19-st001.pdf [file mBio.02364-19-st001.pdf]

**Table S1**

(A)

| Strain                          | Sequence Coverage | Targeting Position                 | deletion size | Number of other variants <sup>g</sup> |
|---------------------------------|-------------------|------------------------------------|---------------|---------------------------------------|
| <b><i>M. marinum</i></b>        |                   |                                    |               |                                       |
| whiB6_1                         | 538.3             | 6577131-6577155                    | Δ13bp         | 2                                     |
| whiB6_2                         | 388.1             |                                    | Δ133bp        | 3                                     |
| whiB6_3                         | 347.4             |                                    | Δ404 bp       | 3                                     |
| whiB6_4                         | 375.2             |                                    | Δ1320 bp      | 3                                     |
| whiB6_5                         | 360.7             |                                    | Δ9206 bp      | 2                                     |
| whiB6_6                         | 380.7             |                                    | Δ10179 bp     | 2                                     |
| <b>H37Ra</b>                    |                   |                                    |               |                                       |
| RecX <sup>a</sup>               | 555.2             | -                                  | -             | 1                                     |
| vapC47_1 <sup>b</sup>           | 665.2             | 3835504-3835524                    | Δ15bp         | 0                                     |
| relG_1 <sup>b</sup>             | 601.2             | 3189961-3189982                    | Δ16bp         | 0                                     |
| vapC43_1 <sup>b</sup>           | 870.1             | 3195700-3195720                    | Δ3bp          | 0                                     |
| vapC22_1 <sup>c</sup>           | 940.3             | 3148944-3145963                    | Δ15bp         | 1                                     |
| RecA <sub>mu</sub> <sup>d</sup> | 467.7             | -                                  | -             | 3                                     |
| vapC43_2 <sup>e</sup>           | 503.2             | 3195700-3195720                    | Δ191bp        | 0                                     |
| relK_1 <sup>e, f</sup>          | 1580.8            | 3780210-3780230<br>3780235-3780254 | Δ28bp         | 0                                     |

<sup>a</sup> H37Ra harboring the helper plasmid pNHEJ-*recX*.<sup>b</sup> Genome editing using the helper plasmid pNHEJ-*recX*.<sup>c</sup> Genome editing using the helper plasmid pNHEJ-*recX-sacB*.<sup>d</sup> H37Ra harboring the helper plasmid pNHEJ- *recA<sub>mu</sub>*.<sup>e</sup> Genome editing using the helper plasmid pNHEJ-*recA<sub>mu</sub>*.<sup>f</sup> Paired sgRNAs were used for genome editing.<sup>g</sup> The tested strains were compared to the wild-type strain or the strain harboring the corresponding helper plasmid.

(B) The SNVs or INDELs detected via whole-genome sequencing as in Table S1A.

| Strain_Clone            | Type  | Region  | Genes       | References | Alleles |
|-------------------------|-------|---------|-------------|------------|---------|
| <b><i>M.marinum</i></b> |       |         |             |            |         |
| whiB6_1/2/3/4/5/6       | SNV   | 113853  | MMAR_0099   | C          | G       |
| whiB6_1/2/3/4/5/6       | SNV   | 4013302 | MMAR_3268   | A          | C       |
| whiB6_2                 | SNV   | 1309419 | <i>rpsD</i> | C          | T       |
| whiB6_3                 | SNV   | 6635724 | MMAR_5578   | C          | A       |
| whiB6_4                 | INDEL | 3789244 | intergenic  | -          | C       |
| <b>H37Ra</b>            |       |         |             |            |         |
| RecX                    | SNV   | 1474556 | MRA_r01     | A          | G       |
| vapC22_1                | INDEL | 3977765 | intergenic  | C          | -       |
| RecA <sub>mu</sub>      | SNV   | 136884  | MRA_0117    | T          | C       |
|                         | SNV   | 1474556 | MRA_r01     | A          | G       |
|                         | SNV   | 3043962 | lexA        | G          | A       |
