# Supplementary material for: A CRISPR-Assisted Nonhomologous End-Joining Strategy for Efficient Genome Editing in Mycobacterium tuberculosis
Source: PubMed Central journal article supplement (PMC6989103; doi:10.1128/mbio.02364-19), 2020-01-28
Supplement: mBio.02364-19-st003.pdf [file mBio.02364-19-st003.pdf]

**Table S3 Genome editing in *M. tuberculosis* H37Rv and *M. bovis* BCG.**

| Gene name      | Description                                                                | No. of mutant/ No. of test |
|----------------|----------------------------------------------------------------------------|----------------------------|
| <b>H37Rv</b>   |                                                                            |                            |
| Rv0059         | Toxin                                                                      | 9/12                       |
| Rv0299         | Toxin, MazF10                                                              | 6/8                        |
| Rv0301         | Toxin, VapC2                                                               | 3/3                        |
| Rv0609         | Toxin, VapC28                                                              | 7/8                        |
| Rv0919         | Toxin                                                                      | 4/8                        |
| Rv2010         | Toxin, VapC15                                                              | 12/14                      |
| Rv1273c-1272c* | Drug ABC transporter ATP-binding protein                                   | 14/16                      |
| <b>BCG</b>     |                                                                            |                            |
| Mb1074         | Toxin                                                                      | 10/13                      |
| Mb2057c        | Heat shock protein hspx                                                    | 13/16                      |
| Mb2891         | Toxin, RelG                                                                | 6/10                       |
| Mb2897         | Toxin, VapC43                                                              | 5/8                        |
| Mb1304c-1303c* | Probable drugs-transport transmembrane ATP-binding protein ABC transporter | 20/24                      |

\* Double sgRNAs were used to delete the entire operon.
