# Supplementary material for: A CRISPR-Assisted Nonhomologous End-Joining Strategy for Efficient Genome Editing in Mycobacterium tuberculosis
Source: PubMed Central journal article supplement (PMC6989103; doi:10.1128/mbio.02364-19), 2020-01-28
Supplement: mBio.02364-19-st004.pdf [file mBio.02364-19-st004.pdf]

**Table S4 Plasmids used in this study.**

| Strains                                | Relevant characteristic(s)                                                                                                                                                                                          | Source and or reference |
|----------------------------------------|---------------------------------------------------------------------------------------------------------------------------------------------------------------------------------------------------------------------|-------------------------|
| pJV53-Cas12a                           | Codon optimized Cas12a under control of the <i>Pmyc1tetO</i> promoter inserted in pJV53 ( <i>oriM</i> ; <i>oriE</i> ; Km <sup>r</sup> ; Che9c; Cas12a)                                                              | reference (1)           |
| pCR-Hyg                                | Shuttle vector containing crRNA cassette under control of <i>hsp60</i> promoter (pBR322 ori; pAL5000ts; Hyg <sup>r</sup> )                                                                                          | reference (1)           |
| pCR-Zeo                                | Shuttle vector containing crRNA cassette under control of <i>hsp60</i> promoter (pBR322 ori; pAL5000ts; Zeo <sup>r</sup> )                                                                                          | reference (1)           |
| pBp4                                   | Shuttle vector containing a replicon of mycobacterial self-replicative plasmid pMF1 (pBR322 ori; pMF1 replicon; Km <sup>r</sup> )                                                                                   | reference (2)           |
| pNHEJ                                  | <i>Mycobacterium smegmatis ku</i> (MSMEG_5580) and <i>ligaseD</i> (MSMEG_5570) gene under control of arabinose promoter from pKD46 ( <i>oriE</i> ; Cm <sup>r</sup> ; <i>ku</i> ; <i>ligD</i> )                      | reference (3)           |
| pZCas9                                 | A plasmid carrying <i>Cas9</i> gene (p15A ori) (Kan <sup>r</sup> ) (p15A ori; Km <sup>r</sup> ; <i>Cas9</i> ;) )                                                                                                    | reference (3)           |
| psgRNA-lacZ                            | A plasmid with a sgRNA ( <i>lacZ</i> spacer) targetting <i>lacZ</i> gene (pBR322-ori; Cm <sup>r</sup> )                                                                                                             | reference (3)           |
| pLJR965                                | CRISPRi integrating plasmid expressing dCas9 <sub>sth1</sub> and the cognate sgRNA (L5; <i>oriE</i> ; Km <sup>r</sup> ; dCas9 <sub>sth1</sub> ;) )                                                                  | reference (4)           |
| pSL003                                 | Shuttle vector expressing site-specific recombinase. ( <i>oriM</i> ; <i>oriE</i> ; Zeo <sup>r</sup> ; Cre)                                                                                                          | reference (5)           |
| pMV261-Cas12a                          | Optimized Cas12a under control of the <i>P<sub>myc1tetO</sub></i> promoter inserted in pMV261 ( <i>oriM</i> ; <i>oriE</i> ; Km <sup>r</sup> ; Cas12a)                                                               | reference (1)           |
| pYC1103                                | <i>whiB6</i> crRNA inserted in pCR-Hyg digested with <i>BpmI</i> and <i>HindIII</i> (pBR322 ori; pAL5000ts;gfp crRNA cassette; Hyg <sup>r</sup> )                                                                   | This study              |
| pYC1178                                | <i>recD</i> crRNA inserted in pCR-Hyg digested with <i>BpmI</i> and <i>HindIII</i> . (pBR322 ori; pAL5000ts;gfp crRNA cassette; Hyg <sup>r</sup> )                                                                  | This study              |
| pYC1521                                | <i>nrgA</i> crRNA inserted in pCR-Hyg digested with <i>BpmI</i> and <i>HindIII</i> (pBR322 ori; pAL5000ts;gfp crRNA cassette; Hyg <sup>r</sup> )                                                                    | This study              |
| pNHEJ-Cas12a                           | NHEJ machinery (Ku-NrgA-LigD) of <i>M. marinum</i> inserted into KpnI and NheI site of pJV53-Cas12a ( <i>oriE</i> ; <i>oriM</i> ; Km <sup>r</sup> ; MmNHEJ; Cas12a )                                                | This study              |
| pNHEJ-Cas12a- <i>recX</i>              | The <i>recX</i> from the <i>M. smegmatis</i> under control of <i>Pmyc</i> inserted into <i>Hind III</i> and <i>Sal I</i> site of pNHEJ-Cas12a ( <i>oriE</i> ; <i>oriM</i> ; Km <sup>r</sup> ; MmNHEJ; <i>recX</i> ) | This study              |
| pNHEJ-Cas12a- <i>recA<sub>mu</sub></i> | The <i>recA R60C</i> from the <i>M. smegmatis</i> under control of native promoter inserted into <i>Hind III</i> and <i>Sal I</i> site of pNHEJ-Cas12a                                                              | This study              |

|                                      |                                                                                                                                                                                                               |            |
|--------------------------------------|---------------------------------------------------------------------------------------------------------------------------------------------------------------------------------------------------------------|------------|
|                                      | ( <i>oriE</i> ; <i>oriM</i> ; Km <sup>r</sup> ; MmNHEJ; <i>recA<sub>mu</sub></i> )                                                                                                                            |            |
| pYC1376                              | NHEJ machinery without NrgA of <i>M. marinum</i> inserted into KpnI and NheI site of pNHEJ-Cas12a- <i>recX</i><br>( <i>oriE</i> ; <i>oriM</i> ; Km <sup>r</sup> ; <i>ku</i> ; <i>ligD</i> ; <i>recX</i> )     | This study |
| pYC1655                              | The sgRNA under the control of an optimized TetR-regulated promoter inserted into pSL003 (pBR322 ori; pAL5000ts; Zeo <sup>r</sup> )                                                                           | This study |
| pYC1286                              | dCas9 <sub>sth1</sub> reverted to nuclease-active Cas9 in pLJR965 (L5; <i>oriE</i> ; Km <sup>r</sup> ; Cas9 <sub>sth1</sub> ;) )                                                                              | This study |
| pNHEJ                                | pNHEJ-Cas12a digested with SpeI and religated to delete Cas12a<br>( <i>oriE</i> ; <i>oriM</i> ; Km <sup>r</sup> ; MmNHEJ; )                                                                                   | This study |
| pNHEJ-Cas9 <sub>sth1</sub>           | Cas9 <sub>sth1</sub> under control of the P <sub>myc1tetO</sub> promoter replace Cas12a<br>( <i>oriE</i> ; <i>oriM</i> ; Km <sup>r</sup> ; MmNHEJ; Cas9 <sub>sth1</sub> )                                     | This study |
| pNHEJ- <i>recX</i>                   | The <i>recX</i> from the <i>M. tuberculosis</i> under control of P <sub>myc</sub> inserted into KpnI site of pNHEJ<br>( <i>oriE</i> ; <i>oriM</i> ; Km <sup>r</sup> ; MmNHEJ; <i>recX</i> )                   | This study |
| pNHEJ- <i>recA<sub>mu</sub></i>      | The <i>recA R61C</i> from the <i>M. tuberculosis</i> under control of native promoter inserted into Kpn I site of pNHEJ<br>( <i>oriE</i> ; <i>oriM</i> ; Km <sup>r</sup> ; MmNHEJ; <i>recA<sub>mu</sub></i> ) | This study |
| pYC1654                              | pYC1376 digested with SpeI and religated to delete Cas12a<br>( <i>oriE</i> ; <i>oriM</i> ; Km <sup>r</sup> ; <i>ku</i> ; <i>ligD</i> ; <i>recX</i> )                                                          | This study |
| pYC1446                              | Integrating plasmid expressing Cas9 <sub>sth1</sub> and the cognate sgRNA (L5; <i>oriE</i> ; Cas9 <sub>sth1</sub> ; Zeo <sup>r</sup> )                                                                        | This study |
| pNHEJ- <i>recX-sacB</i>              | <i>sacB</i> cloned into pNHEJ - <i>recX<sub>mtb</sub></i><br>( <i>oriE</i> ; <i>oriM</i> ; Km <sup>r</sup> ; MmNHEJ; <i>recX</i> ; <i>sacB</i> )                                                              | This study |
| pNHEJ- <i>recA<sub>mu</sub>-sacB</i> | <i>sacB</i> cloned into pNHEJ - <i>recA<sub>mu</sub></i><br>( <i>oriE</i> ; <i>oriM</i> ; Km <sup>r</sup> ; MmNHEJ; <i>recX</i> ; <i>sacB</i> )                                                               | This study |
| pYC1640                              | Shuttle vector containing cas9 <sub>sth1</sub> ,sgRNA cassette and the pMF1 replicon.<br>( <i>oriE</i> ; pMF1 replicon; Zeo <sup>r</sup> )                                                                    | This study |
| pYC2085                              | Shuttle vector containing cas9 <sub>sth1</sub> , sgRNA cassette and the pMF1 replicon.<br>( <i>oriE</i> ; pMF1 replicon; Hyg <sup>r</sup> )                                                                   | This study |
| pZCas9- <i>recX</i>                  | The <i>recX</i> from the <i>E.coli</i> under control of native promoter inserted into pZCas9 (p15A ori; Km <sup>r</sup> ; Cas9; <i>recX</i> )                                                                 | This study |

## References

1. Yan M-Y, Yan H-Q, Ren G-X, Zhao J-P, Guo X-P, Sun Y-C. 2017. CRISPR-Cas12a-assisted recombineering in bacteria. *Applied and Environmental Microbiology* doi:10.1128/aem.00947-17.
2. Bachrach G, Colston MJ, Bercovier H, Bar-Nir D, Anderson C, Papavinasasundaram KG. 2000. A new single-copy mycobacterial plasmid, pMF1, from *Mycobacterium fortuitum* which is compatible with the pAL5000 replicon. *Microbiology* 146:297-303.
3. Zheng X, Li SY, Zhao GP, Wang J. 2017. An efficient system for deletion of large DNA fragments in *Escherichia coli* via introduction of both Cas9 and the non-homologous end joining system from *Mycobacterium smegmatis*. *Biochem Biophys Res Commun* 485:768-774.
4. Rock JM, Hopkins FF, Chavez A, Diallo M, Chase MR, Gerrick ER, Pritchard JR, Church GM, Rubin EJ, Sasseti CM, Schnappinger D, Fortune SM. 2017. Programmable transcriptional repression in mycobacteria using an orthogonal CRISPR interference platform. *Nat Microbiol* 2:16274.
5. Wu X, Fang W, Yu Y, Song H. 2012. [Development and application of homologous recombination knockout system in *Mycobacterium tuberculosis*]. *Wei Sheng Wu Xue Bao* 52:1151-9.
